# Supplementary material for: Bright luminescence from pure DNA-curcumin–based phosphors for bio hybrid light-emitting diodes
Source: PubMed Central journal article supplement (PMC5004171; doi:10.1038/srep32306), 2016-08-30
Supplement: srep32306-s1.pdf [file srep32306-s1.pdf]

## SUPPLEMENTARY INFORMATION

### **Bright luminescence from pure DNA-curcumin–based phosphors for bio hybrid light-emitting diodes**

M. Siva Pratap Reddy<sup>1</sup> and Chinho Park<sup>1,2\*</sup>

<sup>1</sup>*LED-IT Fusion Technology Research Center, Yeungnam University, Gyeongsan 38541, Republic of Korea*

<sup>2</sup>*School of Chemical Engineering, Yeungnam University, Gyeongsan 38541, Republic of Korea*

\*Email: [chpark@ynu.ac.kr](mailto:chpark@ynu.ac.kr) (C. Park)

TEL : +82-53-810-2522

FAX : +82-53-810-4613

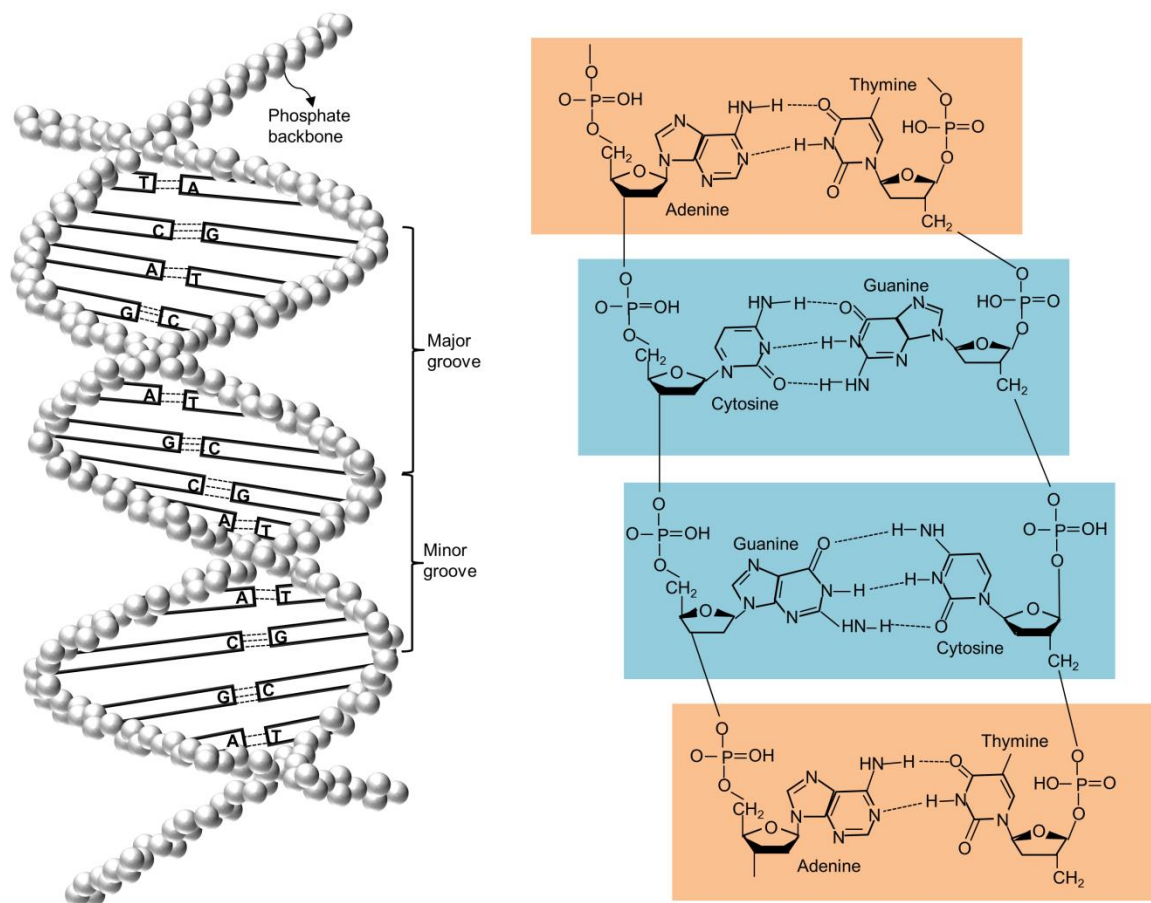

**Supplementary Figure S1.** Schematic chemical structure and minor and major groove positions of DNA (contains sugar phosphate backbone) with base pairs of adenine, A, thymine, T, cytosine, C, and guanine, G.

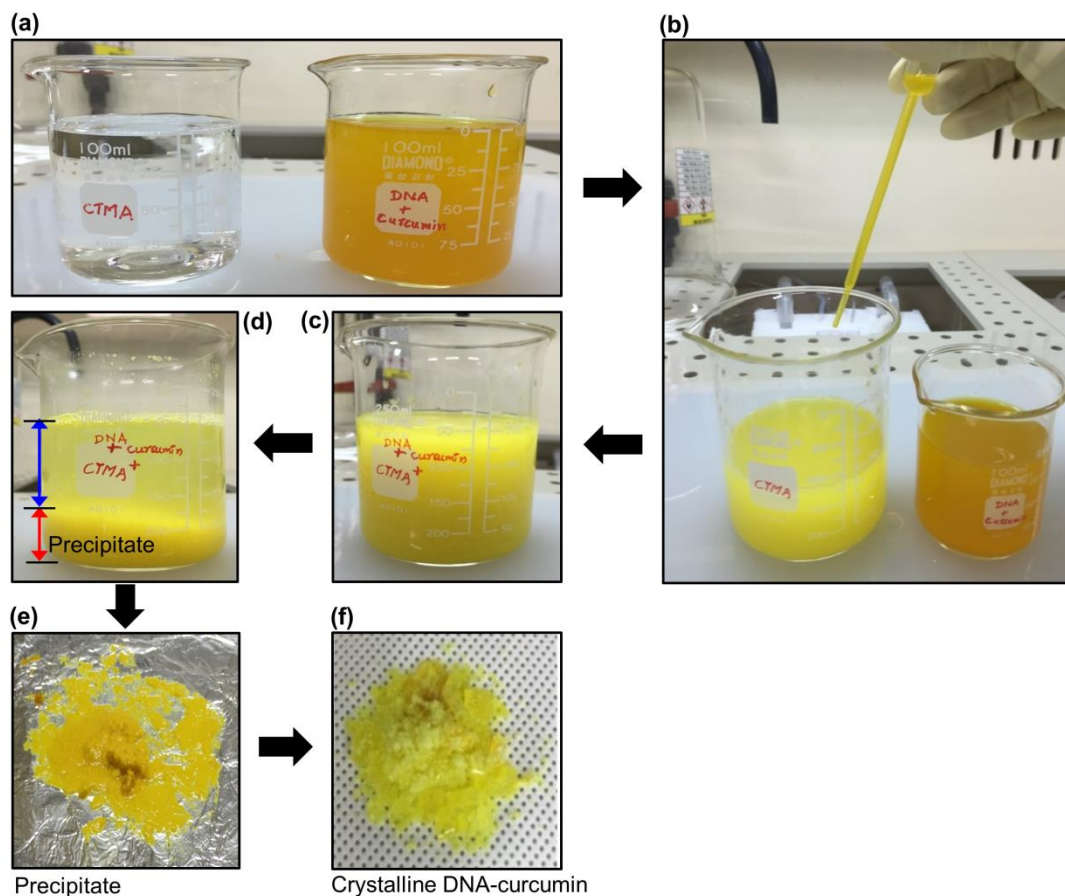

**Supplementary Figure 2.** Pictorial representation of experiment steps for DNA-CTMA-curcumin crystalline powder preparation protocols (a) Combination of CTMA and aqueous solution of DNA-curcumin. (b) Mixing of aqueous DNA-curcumin solution in CTMA. (c) Mixed aqueous DNA-curcumin-CTMA solution. (d) DNA-curcumin-CTMA precipitate out from the solution. (e) Separation of precipitate from solution. (f) Finally, Crystalline DNA-CTMA-curcumin is obtained by oven-drying for 2 h at 60 °C.

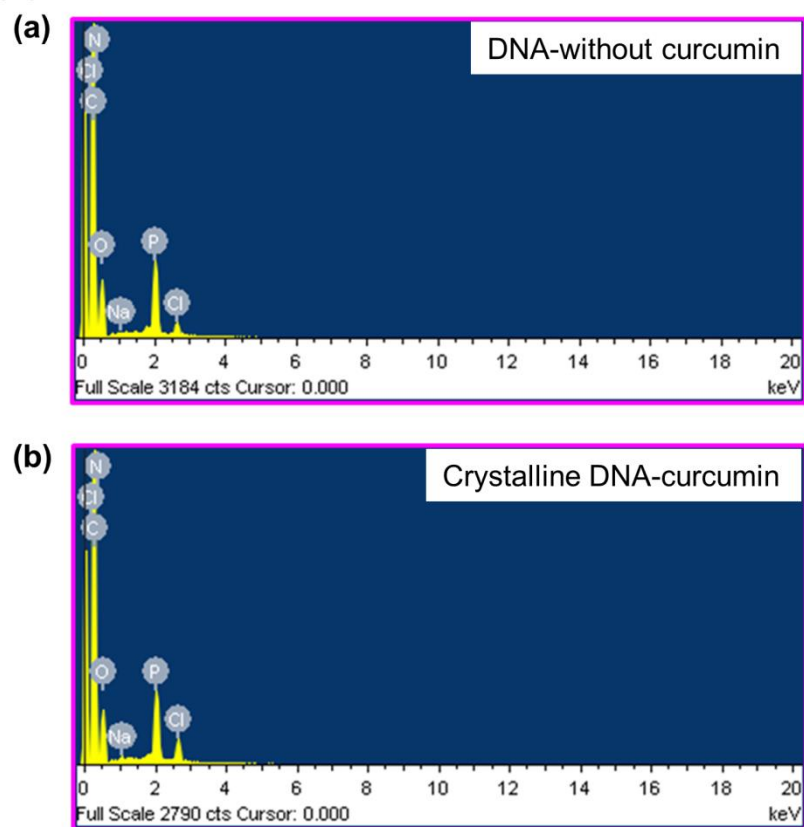

**Supplementary Figure S3.** Elemental spectra of (a) DNA-without curcumin and (b) crystalline DNA-curcumin obtained using energy dispersive X-ray spectroscopy (EDX).

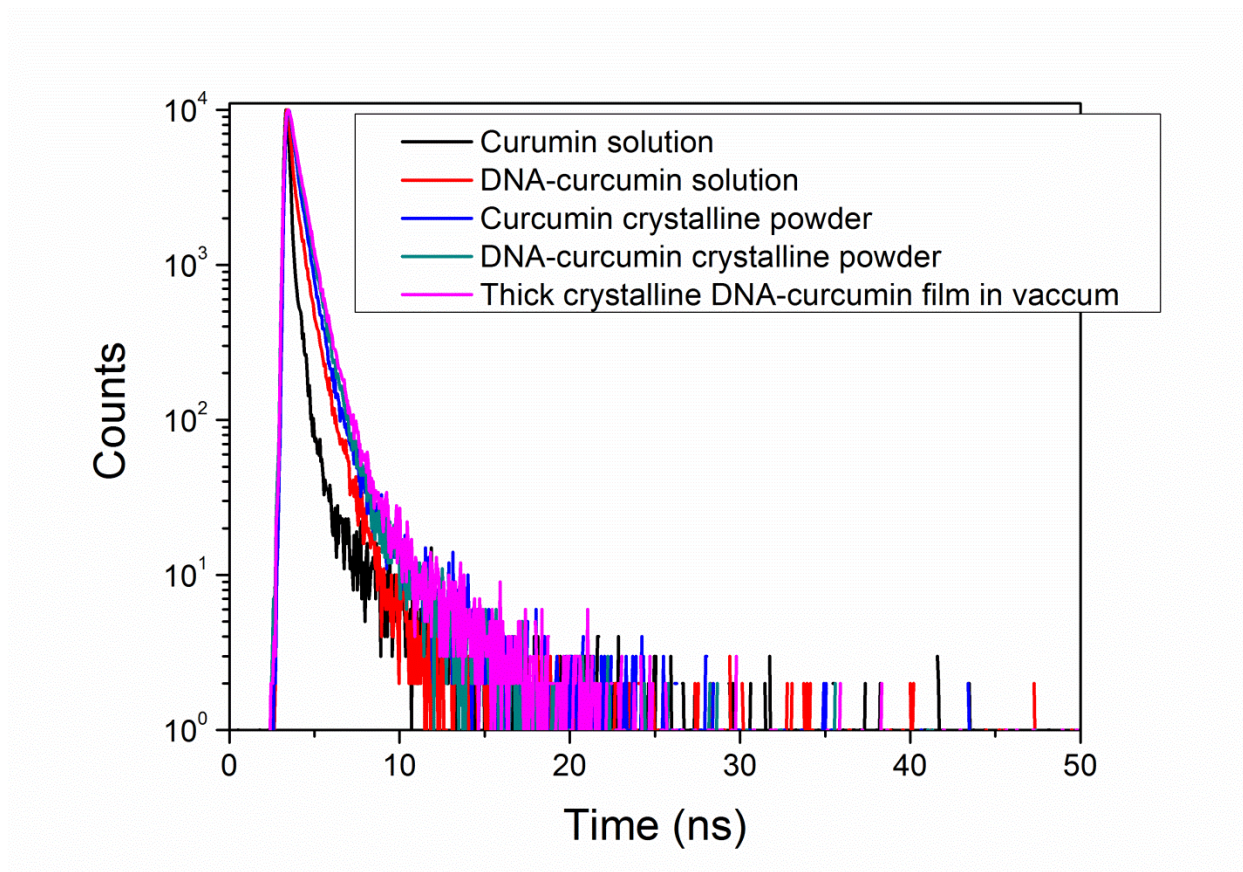

**Supplementary Figure S4.** Decay profiles of curcumin DNA-curcumin in solution, curcumin, DNA-curcumin in crystalline form, and thick crystalline DNA-curcumin film in vacuum conditions.

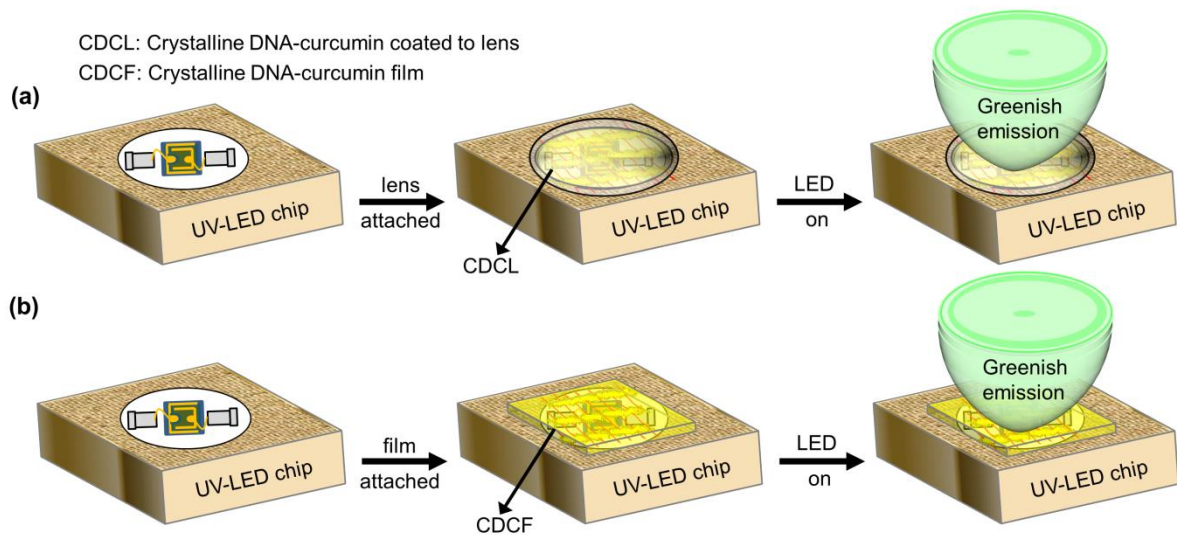

**Supplementary Figure S5.** Schematic graphical illustration of HyBi-LED process: crystalline DNA-curcumin. (a) Coated on lens. (b) Thick film-attaching techniques.

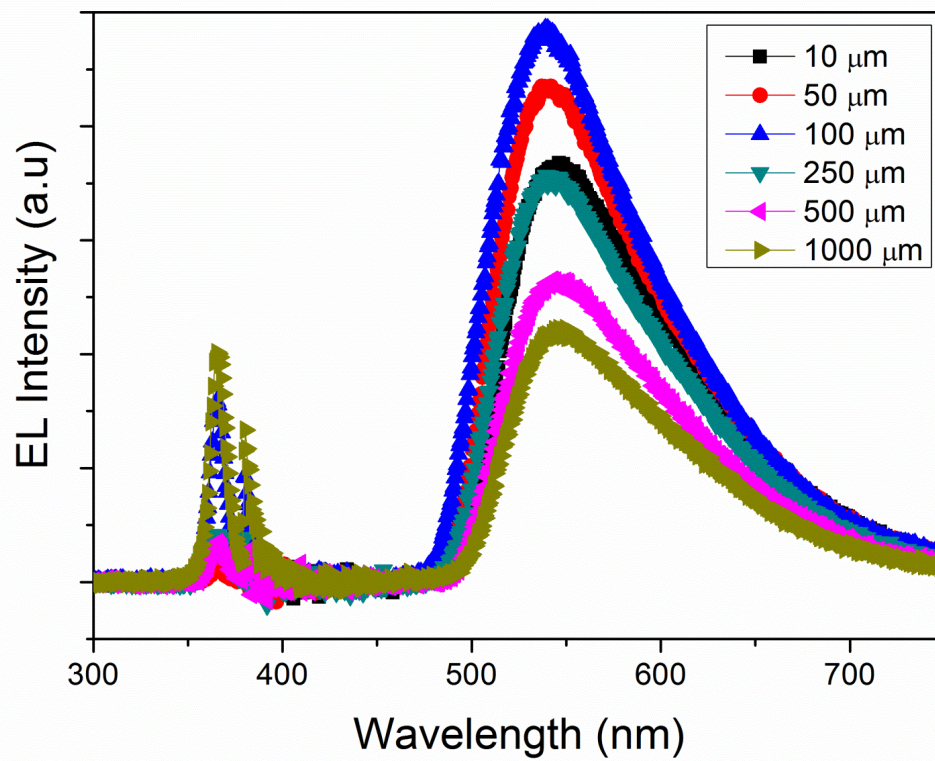

**Supplementary Figure S6.** Changes in the EL spectra of Bio-HLED (at injection current of 10 mA) with a different thickness of thick crystalline DNA-curcumin film.

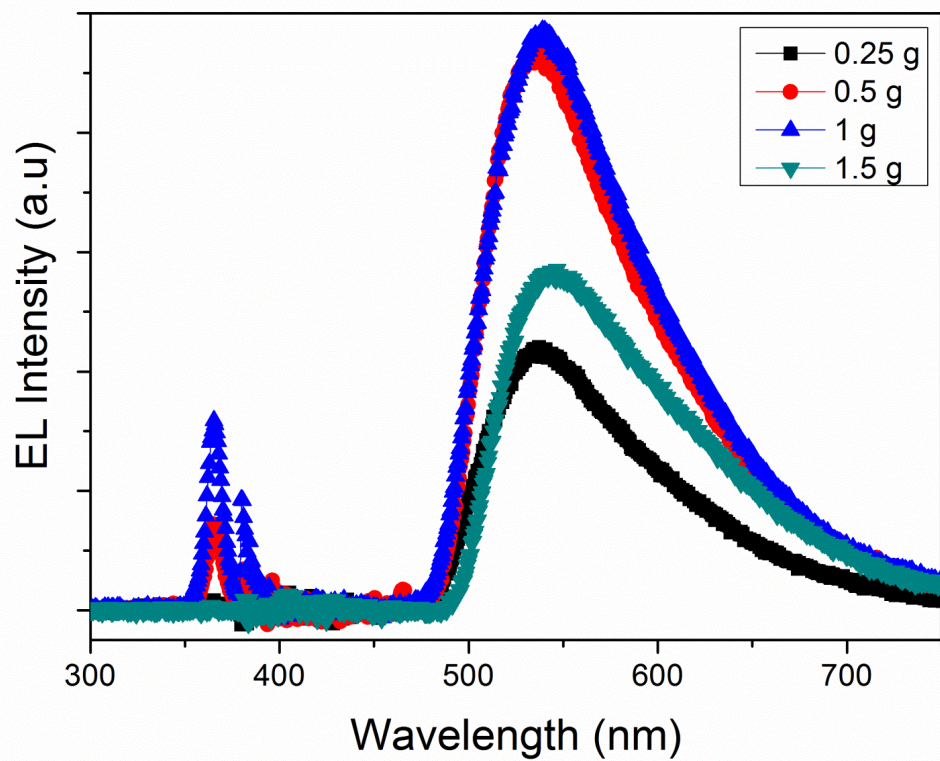

**Supplementary Figure S7.** Changes in the EL spectra of Bio-HLED with a different amount of curcumin to DNA at constant thickness of 100  $\mu\text{m}$  thick crystalline DNA-curcumin film.



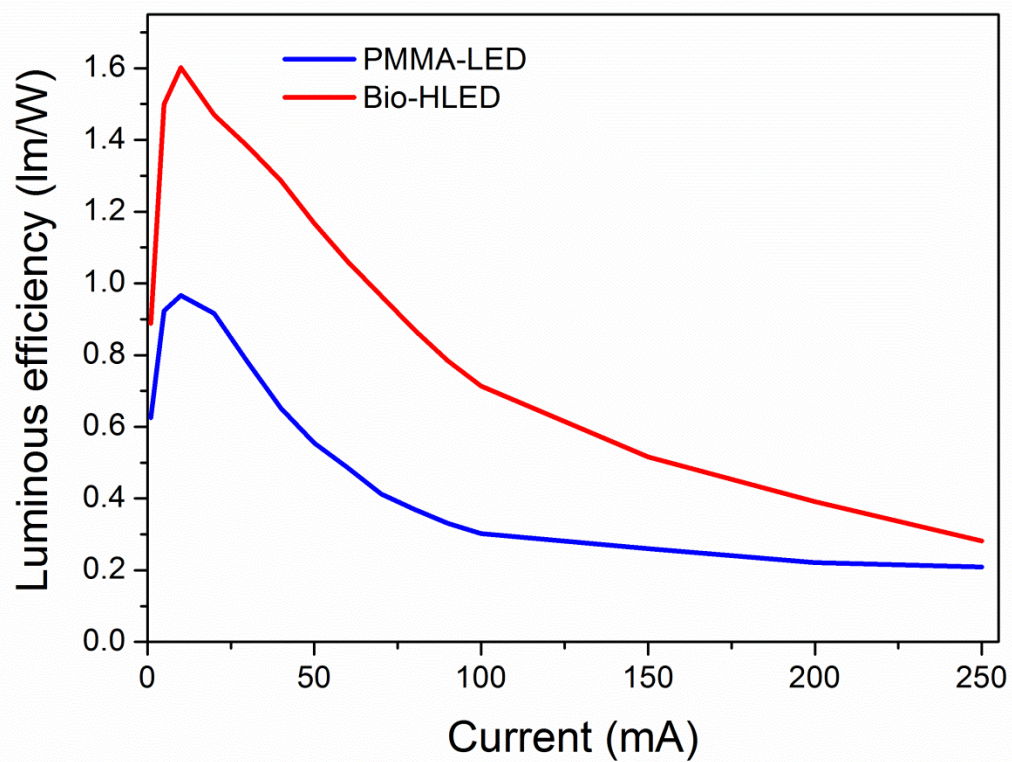

**Supplementary Figure S8.** Luminous efficiency including PMMA-LED comparison, which revealed that Bio-HLED showed bright luminescence from 1 to 250 mA compared to PMMA-LED.

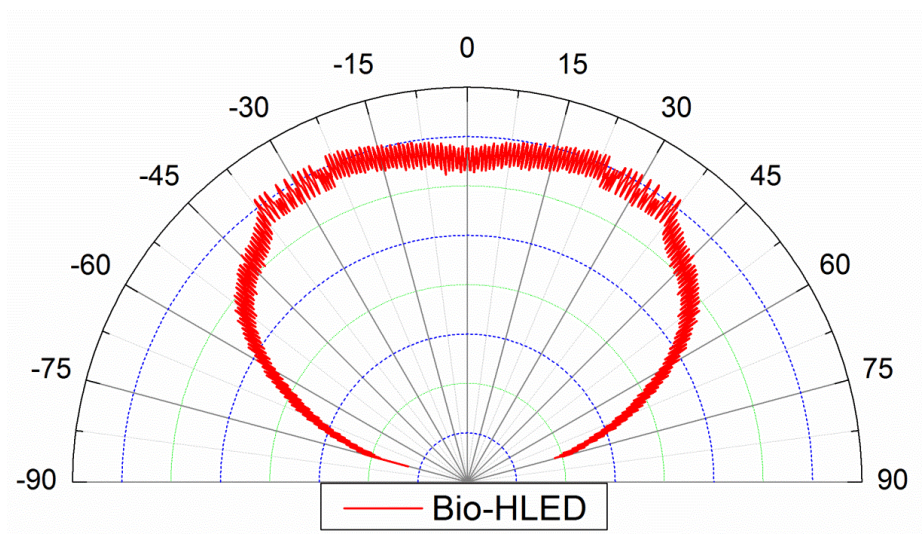

**Supplementary Figure S9.** The angular spatial photon distribution characteristics of the Bio-HLED.

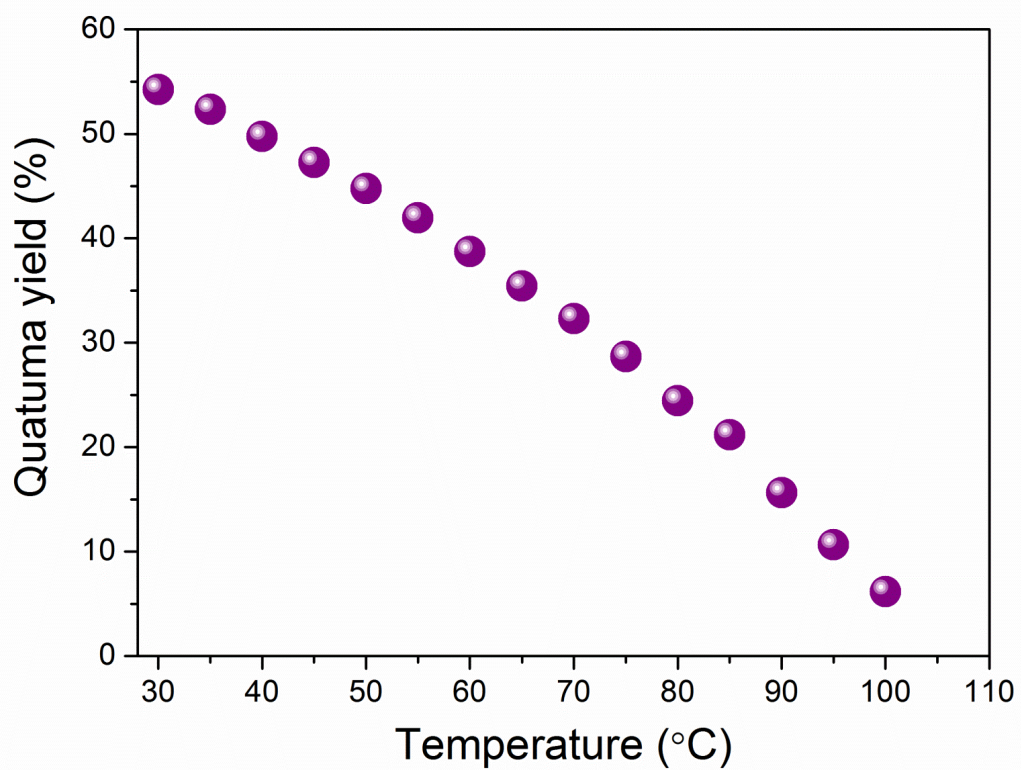

**Supplementary Figure S10.** The quantum yields of Bio-HLED as a function of temperature from 27 to 100 °C.

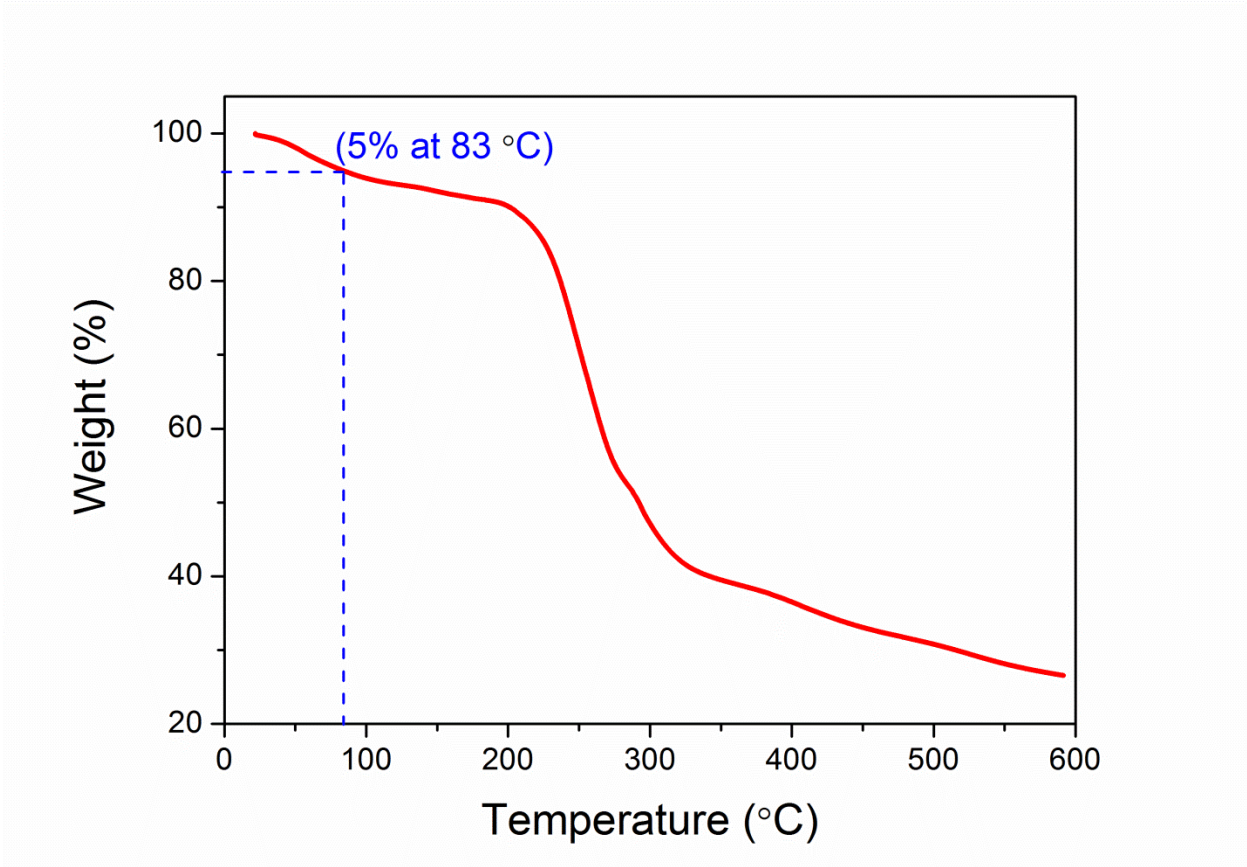

**Supplementary Figure S11.** TGA spectra of crystalline DNA-curcumin.

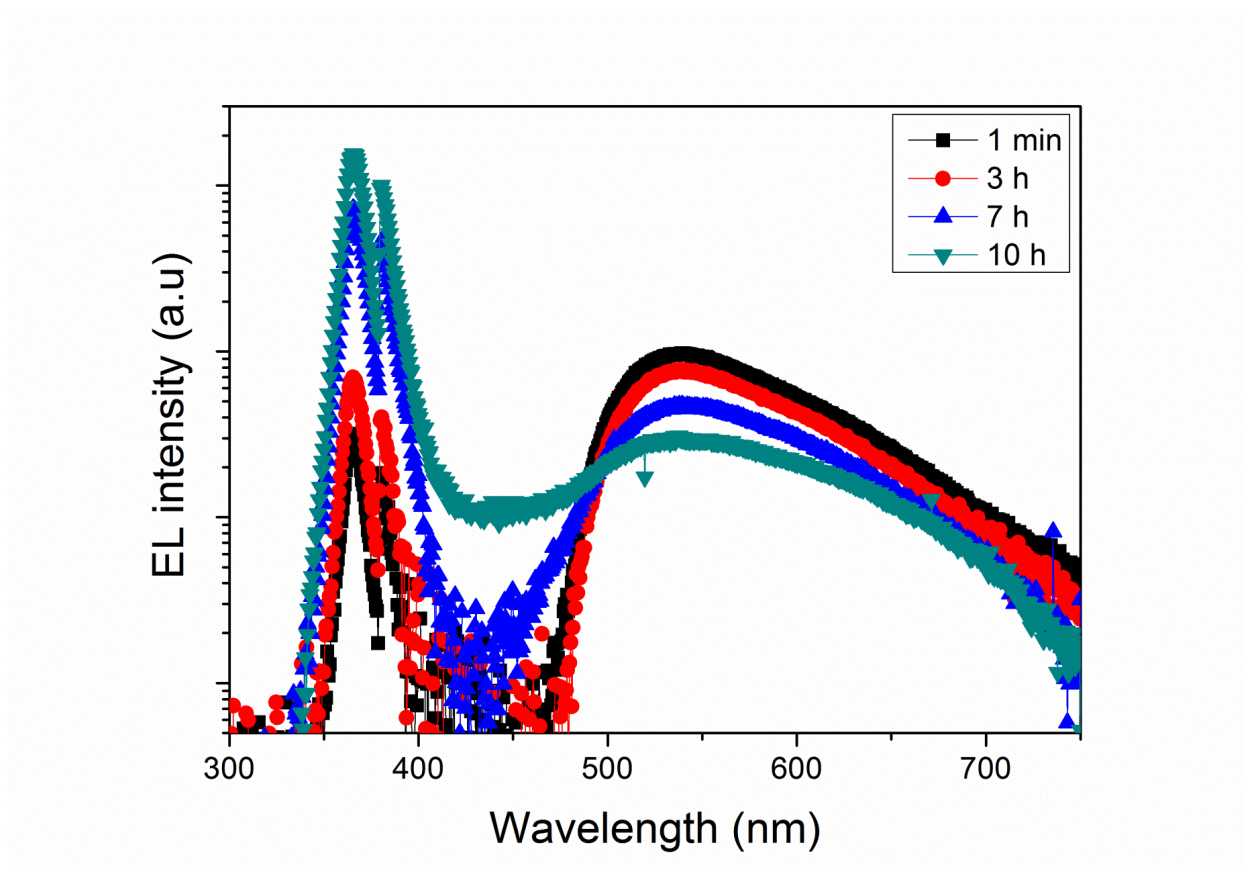

**Supplementary Figure S12.** Changes in the EL spectra of Bio-HLED (at injection current of 10 mA) over time.

**Supplementary Table 1.** Luminous efficiency and CIE colour co-ordinates of Bio-HLED based on different thickness of thick crystalline DNA-curcumin film measured at 10 mA.

| <b>Thickness (<math>\mu\text{m}</math>)</b> | <b>Luminous efficiency (lm/W)</b> | <b>CIE colour co-ordinates (x,y)</b> |
|---------------------------------------------|-----------------------------------|--------------------------------------|
| 10                                          | 1.254                             | (0.40, 0.57)                         |
| 50                                          | 1.508                             | (0.40, 0.56)                         |
| 100                                         | 1.602                             | (0.39, 0.56)                         |
| 250                                         | 1.426                             | (0.41, 0.56)                         |
| 500                                         | 1.348                             | (0.42, 0.55)                         |
| 1000                                        | 1.166                             | (0.43, 0.55)                         |

**Supplementary Table 2.** Luminous efficiency and CIE colour co-ordinates of Bio-HLED based on different amount of curcumin to DNA at constant thickness of 100  $\mu\text{m}$  thick crystalline DNA-curcumin film.

| <b>Weight amount (g)</b> | <b>Luminous efficiency (lm/W)</b> | <b>CIE colour co-ordinates (x,y)</b> |
|--------------------------|-----------------------------------|--------------------------------------|
| 0.25                     | 1.288                             | (0.36, 0.56)                         |
| 0.5                      | 1.498                             | (0.38, 0.56)                         |
| 1                        | 1.602                             | (0.39, 0.56)                         |
| 1.5                      | 0.914                             | (0.43, 0.54)                         |
